# Supplementary material for: In Vitro Secondary Structure of the Genomic RNA of Satellite Tobacco Mosaic Virus
Source: PLoS One. 2013 Jan 22;8(1):e54384. doi: 10.1371/journal.pone.0054384 (PMC3551766; doi:10.1371/journal.pone.0054384)
Supplement: Table S1 — Primers used to analyze the STMV RNA. (PDF) [file pone.0054384.s006.pdf]

**Table S1**

| Primer | Primer annealing location | Nucleotides read (useable data) | Nucleotides used in combined signal |
|--------|---------------------------|---------------------------------|-------------------------------------|
| 1      | 1-20                      | 25-370                          | 25-236                              |
| 2      | 209-228                   | 237-595                         | 237-396                             |
| 3      | 372-391                   | 397-756                         | 397-655                             |
| 4      | 629-648                   | 656-1014                        | 656-864                             |
| 5      | 839-858                   | 865-1053                        | 865-1053                            |
